# Supplementary material
Source: publisher figshare collection journal article supplement (https://acs.figshare.com/ndownloader/files/5791734)
Supplement: Supplementary file 1 [file 5791734]

#### Terms & Conditions

Electronic Supporting Information files are available without a subscription to ACS Web Editions. The American Chemical Society holds a copyright ownership interest in any copyrightable Supporting Information. Files available from the ACS website may be downloaded for personal use only. Users are not otherwise permitted to reproduce, republish, redistribute, or sell any Supporting Information from the ACS website, either in whole or in part, in either machine-readable form or any other form without permission from the American Chemical Society. For permission to reproduce, republish and redistribute this material, requesters must process their own requests via the RightsLink permission system. Information about how to use the RightsLink permission system can be found at <http://pubs.acs.org/page/copyright/permissions.html>

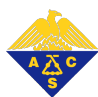

ACS Publications

MOST TRUSTED. MOST CITED. MOST READ.

Copyright © 1996 American Chemical Society

**Supplementary Material for: Independent Generation and Reactivity of 2'-Deoxyurid-1'-yl.**

Brian K. Goodman and Marc M. Greenberg\*  
Department of Chemistry, Colorado State University  
Fort Collins, CO 80523

**Preparation of Disiloxane of 3.** Psicofuranosyluracil (2.87 g, 11.1 mmol) was dried by azeotrope from pyridine (2 x 5 mL). Dried psicofuranosyluracil was dissolved in pyridine (120 mL), and 1,3-dichloro-1,1,3,3-tetrakis(isopropyl)disiloxane (3.85 g, 12.3 mmol) in pyridine (15 mL) was added at -20°C over the course of 2.5 h. After allowing the reaction to stir and warm to room temperature overnight, it was quenched with saturated NaHCO<sub>3</sub>. The solvents were removed in vacuo, and the residue was taken up in EtOH (100 mL). The solids were filtered, and the salts washed with EtOH (3 x 25 mL). Silica gel (30 g) was added, and after removing the solvent in vacuo it was applied to a column of silica (150 g). The column was eluted with EtOAc: Hex (1:1), which were increased to EtOAc: Hex (3:2) upon commencement of product elution. The column was washed with EtOH in order to elute polar products. Disiloxane **3** (1.43 g, 26%) was obtained as an oil. Psicofuranosyluracil could be recovered from the mixture of undesired silylated nucleosides by desilylation with NH<sub>4</sub>F in MeOH. <sup>1</sup>H NMR (CDCl<sub>3</sub>) δ 8.56 (bd s, 1H), 7.93 (d, 1H, J=8.5 Hz), 5.64 (d, 1H, J=8.5 Hz), 4.31 (m, 1H), 4.02 (m, 4H), 3.82 (dd, 1H, J=2.5, 8 Hz), 2.92 (dd, 1H, J=6.8, 13.5 Hz), 2.47 (t, 1H, J=6 Hz), 2.40 (dd, 1H, J=10.5, 13.5 Hz), 0.98 (m, 28 H). <sup>13</sup>C NMR (CDCl<sub>3</sub>) δ 164.8, 150.3, 141.9, 100.6, 97.2, 85.1, 67.9, 65.2, 60.1, 39.4, 17.4, 17.2, 17.1, 16.9, 16.8, 13.4, 13.0, 12.8, 12.4. IR (film) 3445, 2944, 2868, 1709, 1691, 1679, 1462, 1300, 1118, 1038 cm<sup>-1</sup>. Anal. Calcd. for C<sub>22</sub>H<sub>40</sub>N<sub>2</sub>O<sub>7</sub>Si<sub>2</sub>: C, 52.77; H, 8.05; N, 5.59. Found: C, 52.52; H, 7.89; N, 5.60.

**Preparation of 4.** DMSO (0.22 g, 2.8 mmol) in CH<sub>2</sub>Cl<sub>2</sub> (9 mL) was added dropwise to oxalyl chloride (0.175 g, 1.38 mmol) in CH<sub>2</sub>Cl<sub>2</sub> (7 mL) at -60°C. After stirring for 10 min, **3** (0.62 g, 1.22 mmol) was added in CH<sub>2</sub>Cl<sub>2</sub> (9 mL). After stirring for 35 min at -60°C, triethylamine (0.66

g, 6.43 mmol) was added. The mixture was stirred briefly at  $-60^{\circ}\text{C}$ , before warming to room temperature. The reaction mixture was quenched with  $\text{H}_2\text{O}$  (30 mL), and extracted with  $\text{CH}_2\text{Cl}_2$  (2 x 100 mL). The organic layers were combined and washed with 1%  $\text{HCl}$  (75 mL), followed by 5%  $\text{NaHCO}_3$  (75 mL) and brine (100 mL). After drying over  $\text{MgSO}_4$ , the solvents were removed in vacuo to yield 0.56 g (91%) of **4**. An analytical sample could be obtained via flash chromatography ( $\text{EtOAc}:\text{CH}_2\text{Cl}_2$ ; 1:1). However, in practice **4** was carried on without further purification. mp  $148\text{--}148.5^{\circ}\text{C}$ .  $^1\text{H}$  NMR ( $\text{CDCl}_3$ )  $\delta$  9.22 (s, 1H), 8.78 (bd s, 1H), 7.90 (d, 1H,  $J=8$  Hz), 5.75 (d, 1H,  $J=8$  Hz), 4.39 (m, 1H), 4.13 (d, 1H,  $J=14$  Hz), 3.95 (dd, 1H,  $J=2.6, 14$  Hz), 3.74 (dd, 1H,  $J=1.5, 9$  Hz), 3.09 (dd, 1H,  $J=10.3, 13.4$  Hz), 2.33 (dd, 1H,  $J=8, 13.4$  Hz), 0.91 - 1.08 (m, 28 H).  $^{13}\text{C}$  NMR ( $\text{CDCl}_3$ )  $\delta$  187.7, 163.7, 150.4, 139.1, 102.2, 92.6, 85.2, 66.7, 58.8, 37.0, 25.4, 24.6, 17.4, 17.3, 17.2, 17.1, 17.0, 16.9, 16.7, 13.4, 12.8, 12.4. IR (film) 2946, 2894, 2868, 1745, 1700, 1464, 1386, 1301, 1276, 1118, 1077, 1056,  $1038\text{ cm}^{-1}$ . Anal. calcd. for  $\text{C}_{22}\text{H}_{38}\text{N}_2\text{O}_7\text{Si}_2$ : C, 52.98; H, 7.68; N, 5.62. Found: C, 53.13; H, 7.82; N, 5.61.

**Preparation of 5.** To **4** (402 mg, 0.81 mmol) in THF (5 mL) at  $-78^{\circ}\text{C}$  was added  $t\text{-BuLi}$  (1.08 mL, 1.5 M) solution. The solution was stirred for 3 h, at which time it was quenched by the addition of 0.3 N  $\text{NaOAc}$  (1 mL), and allowed to warm to room temperature. The solution was diluted with  $\text{EtOAc}$  (45 mL), washed with  $\text{H}_2\text{O}$  (30 mL) and brine (40 mL). After drying over  $\text{MgSO}_4$ , the secondary alcohol (243 mg, 54%) was obtained as a mixture of diastereomers by flash chromatography ( $\text{EtOAc}:\text{Hexanes}$ ; 1:4). The alcohol was very unstable, and was typically used immediately.  $^1\text{H}$  NMR ( $\text{CDCl}_3$ )  $\delta$  9.15 (bd s, 1H), 8.08 (d, 1H,  $J=8$  Hz, minor), 8.00 (d, 1H,  $J=8$  Hz, major), 5.69 (dd, 1H,  $J=2.8$  Hz), 4.21 - 3.85 (m, 4H), 3.12 - 2.95 (m, 1H), 2.91 (d, 1H,  $J=9$  Hz, major), 2.78 - 2.55 (m, 1H), 2.40 (d, 1H,  $J=9.5$  Hz), 2.03 (d, 1H,  $J=9.5$  Hz), 1.26 - 0.82 (m, 37H).

Dess-Martin periodinane (526 mg, 1.10 mmol) was added to the alcohol (243 mg, 0.44 mmol) in  $\text{CH}_2\text{Cl}_2$  (20 mL) at  $0^\circ\text{C}$ . After stirring for 5 h at room temperature, additional Dess-Martin reagent (526 mg, 1.10 mmol) was added, and the reaction was stirred overnight. The mixture was diluted with EtOAc (75 mL) and washed with cold, saturated  $\text{NaHCO}_3$  (50 mL) with 2.5 g  $\text{Na}_2\text{S}_2\text{O}_3$ . The organic layer was washed with brine (25 mL) and dried over  $\text{MgSO}_4$ . The residue was purified by flash chromatography (EtOAc: Hex; 1:4) to yield 213 mg of **5** (88%).  $^1\text{H}$  NMR ( $\text{CDCl}_3$ )  $\delta$  8.68 (bd s, 1H), 8.03 (d, 1H,  $J=8$  Hz), 5.73 (dd, 1H,  $J=1.8, 8.2$  Hz), 4.34 (m, 1H), 4.16 (d, 1H,  $J=14$  Hz), 3.96 (dd, 1H,  $J=2.6, 13.5$  Hz), 3.69 (dd, 1H,  $J=1.7, 9$  Hz), 3.42 (dd, 1H,  $J=11.5, 13.5$  Hz), 2.23 (dd, 1H,  $J=6.7, 13.5$  Hz), 1.15 - 0.97 (m, 37 Hz). IR (soln) 3184, 3054, 2945, 2867, 1682, 1622, 1463, 1384, 1366, 1299, 1272, 1203, 1149, 1116, 1039  $\text{cm}^{-1}$ .

**Preparation of 2.**  $\text{NH}_4\text{F}$  (73 mg, 1.96 mmol) and **5** (51.4 mg, 0.09 mmol) were refluxed in MeOH (4 mL) for 2 h. The reaction mixture was cooled to room temperature and quenched with saturated  $\text{NaHCO}_3$  (1 mL). The solvents were removed in vacuo, and the salts were washed with EtOAc (25 mL), filtered and concentrated. The residue was chromatographed (MeOH: EtOAc: Hexanes; 1:4:5) to yield 28 mg of **2** (96%). MP:  $195 - 196^\circ\text{C}$ .  $^1\text{H}$  NMR ( $\text{CD}_3\text{CN}$ )  $\delta$  8.09 (d, 1H,  $J=8$  Hz), 5.65 (d, 1H,  $J=8$  Hz), 4.25 (m, 1H), 3.84 - 3.65 (m, 3H), 3.14 (dd, 1H,  $J=7, 14$  Hz), 2.25 (dd, 1H,  $J=7.5, 14$  Hz), 1.15 (s, 9H). IR (film) 3390 (bd), 2962, 1684, 1457, 1419, 1365, 1299, 1227, 1091, 1042  $\text{cm}^{-1}$ . Anal. Calcd. for  $\text{C}_{14}\text{H}_{20}\text{N}_2\text{O}_6$ : C, 53.84; H, 6.45; N, 8.97. Found: C, 53.71; H, 6.47; N, 8.89.
